# Supplementary material
Source: MDPI journal article supplement (https://www.mdpi.com/2073-4352/11/9/1118)
Supplement: s1 [file s1]

# New Radical-Cation Salts Based on the TMTTF and TMTSF Donors with Iron and Chromium Bis(Dicarbollide) Complexes: Synthesis, Structure, Properties <sup>†</sup>

Denis M. Chudak <sup>1</sup>, Olga N. Kazheva <sup>2,3,\*</sup>, Irina D. Kosenko <sup>4</sup>, Gennady V. Shilov <sup>2</sup>, Igor B. Sivaev <sup>4,5</sup>, Georgy G. Abashev <sup>6</sup>, Elena V. Shklyayeva <sup>6</sup>, Lev I. Buravov <sup>2</sup>, Dmitry N. Pevtsov <sup>2</sup>, Tatiana N. Starodub <sup>7</sup>, Vladimir I. Bregadze <sup>4</sup> and Oleg A. Dyachenko <sup>2</sup>

<sup>1</sup> Chemistry Department, V. N. Karazin Kharkiv National University, 4 Svoboda Sq., 61077 Kharkiv, Ukraine; chudakdenis@gmail.com

<sup>2</sup> Institute of Problems of Chemical Physics, Russian Academy of Sciences, 1 Semenov Av., 142432 Chernogolovka, Moscow Region, Russia; genshil@icp.ac.ru (G.V.S.); buravov@icp.ac.ru (L.I.B.); pevtsovdm@gmail.com (D.N.P.); doa@rfbr.ru (O.A.D.)

<sup>3</sup> Institute of Experimental Mineralogy, Russian Academy of Sciences, 4 Academician Osypyan Str., 4, 142432 Chernogolovka, Moscow Region, Russia

<sup>4</sup> A.N. Nesmeyanov Institute of Organoelement Compounds, Russian Academy of Sciences, 28 Vavilov Str., 119991 Moscow, Russia; kosenko@ineos.ac.ru (I.D.K.); sivaev@ineos.ac.ru (I.B.S.); bre@ineos.ac.ru (V.I.B.)

<sup>5</sup> Basic Department of Chemistry of Innovative Materials and Technologies, G.V. Plekhanov Russian University of Economics, 36 Stremyanniy Line, 117997 Moscow, Russia

<sup>6</sup> Organic Chemistry Department, Perm State University, 15 Bukirev Str., 614990 Perm, Russia; gabashev@psu.ru (G.G.A.); EV\_Shklyayeva@psu.ru (E.V.S.)

<sup>7</sup> Institute of Chemistry, Jan Kochanowski University, 15G Swietokrzyska Str., 25-406 Kielce, Poland; tstarodub@ujk.edu.pl

\* Correspondence: koh@icp.ac.ru

<sup>†</sup> Dedicated to Professor Alan J. Welch in recognition of his outstanding contribution to the chemistry of carboranes.

**Citation:** Chudak, D.M.; Kazheva, O.N.; Kosenko, I.D.; Shilov, G.V.; Sivaev, I.B.; Abashev, G.G.; Shklyayeva, E.V.; Buravov, L.I.; Pevtsov, D.N.; Starodub, T.N.; Bregadze, V.I.; Dyachenko, O.A. New Radical-Cation Salts Based on the TMTTF and TMTSF Donors with Iron and Chromium Bis(Dicarbollide) Complexes: Synthesis, Structure, Properties. *Crystals* **2021**, *11*, 1118. <https://doi.org/10.3390/cryst11091118>

Academic Editors: Georgina Rosair and Marina Yu. Stogniy

Received: 11 August 2021

Accepted: 09 September 2021

Published: 14 September 2021

**Publisher's Note:** MDPI stays neutral with regard to jurisdictional claims in published maps and institutional affiliations.

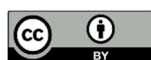

**Copyright:** © 2021 by the authors. Submitted for possible open access publication under the terms and conditions of the Creative Commons Attribution (CC BY) license (<http://creativecommons.org/licenses/by/4.0/>).

## Materials and Methods

### 1. Synthesis of donors and anions

Tetramethyltetrafulvalene (TMTTF) was synthesized as described in [1, 2]. Tetramethyltetraselenafulvalene (TMTSF) was used as received. The supporting electrolytes -  $(\text{Me}_4\text{N})[3,3'\text{-Fe}(1,2\text{-C}_2\text{B}_9\text{H}_{10})_2]$  [3] and  $(\text{Me}_4\text{N})[3,3'\text{-Cr}(1,2\text{-C}_2\text{B}_9\text{H}_{10})_2]$  [4] were prepared as described in the literature.

### 2. Synthesis of radical-cation salts

Radical-cation  $(\text{TMTTF})[3,3'\text{-Cr}(1,2\text{-C}_2\text{B}_9\text{H}_{11})_2]$  (**1**),  $(\text{TMTTF})[3,3'\text{-Fe}(1,2\text{-C}_2\text{B}_9\text{H}_{11})_2]$  (**2**), and  $(\text{TMTSF})_2[3,3'\text{-Cr}(1,2\text{-C}_2\text{B}_9\text{H}_{11})_2]$  (**3**) salts were grown by anodic oxidation the corresponding electron donors in the presence of a supporting electrolyte at ambient temperature under argon atmosphere in standard two-electrode H-cell with platinum electrodes separated by glass frit under galvanostatic conditions. The black crystals were grown on the anode. Crystals of (**1**) and (**3**) were obtained from the  $(\text{Me}_4\text{N})[3,3'\text{-Cr}(1,2\text{-C}_2\text{B}_9\text{H}_{10})_2]$  ( $1.5 \cdot 10^{-3}$  M) – TMTTF for (**1**) or TMTSF for (**3**) ( $2 \times 10^{-3}$  M) system using 1,1,2-trichloromethane - acetonitrile (12 : 1) mixture as a solvent. The current applied was changed discretely on 0.05  $\mu\text{A}$  per day from 0.3 to 1.7  $\mu\text{A}$ . The period of crystal growth was 4 weeks. Crystals of (**2**) were obtained from the  $(\text{Me}_4\text{N})[3,3'\text{-Fe}(1,2\text{-C}_2\text{B}_9\text{H}_{10})_2]$  ( $7.5 \cdot 10^{-3}$  M) – TMTTF ( $2 \times 10^{-3}$  M) system using dichloromethane – acetonitrile (6 : 1) mixture as a solvent. The period of crystal growth was 3 weeks. The current applied was changed discretely on 0.1  $\mu\text{A}$  per day from 0.15 to 2.25  $\mu\text{A}$ .

### 3. X-Ray diffraction study

X-ray diffraction study of  $(\text{TMTTF})[3,3'\text{-Cr}(1,2\text{-C}_2\text{B}_9\text{H}_{11})_2]$  (**1**),  $(\text{TMTTF})[3,3'\text{-Fe}(1,2\text{-C}_2\text{B}_9\text{H}_{11})_2]$  (**2**), and  $(\text{TMTSF})_2[3,3'\text{-Cr}(1,2\text{-C}_2\text{B}_9\text{H}_{11})_2]$  (**3**) was carried out with a Bruker APEX II CCD diffractometer (Mo- $K_\alpha$ -radiation, graphite monochromator,  $\omega$ -scan technique). The experiment for (**2**) was carried out at room temperature, while for (**1**) and (**3**) - at 173 K. The structures were solved by direct methods followed by Fourier difference syntheses and refined by the full-matrix least-squares method in anisotropic approximation for all non-hydrogen atoms using SHELX software [5, 6]. An absorption correction using the APEX2 was applied [7]. Coordinates of hydrogen atoms were defined experimentally and refined isotropically or were fixed in positions of ideal geometry. In (**2**) C(2) and B(2) atoms are disordered over two sites with the populations of 0.5 by the symmetry conditions.

### 4. Electric resistivity measurements

The temperature dependence of electric resistivity of single crystals was measured using four-contact-probe technique. The crystals were glued on the module with platinum thin wire of diameter 15  $\mu\text{m}$  using conducting graphite paint. The module was mounted inside of stainless-steel thin-wall tube (diameter  $\sim 11$  mm), and the tube was slowly inserted to the transport helium jar with gradual cooling.

**Table S1.** Bond lengths (Å) and selected angles (°) in.

(TMTTF)[3,3'-Cr(1,2-C<sub>2</sub>B<sub>9</sub>H<sub>10</sub>)<sub>2</sub>] (**1**)

|             |            |
|-------------|------------|
| Cr(1)-C(1') | 2.1731(15) |
| Cr(1)-C(2)  | 2.1755(15) |
| Cr(1)-C(1)  | 2.1785(15) |
| Cr(1)-C(2') | 2.1801(16) |
| Cr(1)-B(4') | 2.2319(17) |
| Cr(1)-B(4)  | 2.2381(16) |
| Cr(1)-B(7)  | 2.2433(17) |
| Cr(1)-B(7') | 2.2434(16) |
| Cr(1)-B(8') | 2.2765(16) |
| Cr(1)-B(8)  | 2.2794(16) |
| S(1)-C(5)   | 1.7180(15) |
| S(1)-C(3)   | 1.7424(16) |
| S(2)-C(5)   | 1.7168(16) |
| S(2)-C(4)   | 1.7419(16) |
| S(3)-C(6)   | 1.7151(16) |
| S(3)-C(7)   | 1.7327(15) |
| S(4)-C(6)   | 1.7095(15) |
| S(4)-C(8)   | 1.7306(16) |
| C(3)-C(4)   | 1.350(2)   |
| C(3)-C(9)   | 1.499(2)   |
| C(4)-C(10)  | 1.496(2)   |
| C(5)-C(6)   | 1.394(2)   |
| C(7)-C(8)   | 1.357(2)   |
| C(7)-C(11)  | 1.498(2)   |
| C(8)-C(12)  | 1.499(2)   |
| C(1)-C(2)   | 1.603(2)   |
| C(1)-B(4)   | 1.680(2)   |
| C(1)-B(5)   | 1.708(2)   |
| C(1)-B(6)   | 1.718(2)   |
| C(2)-B(7)   | 1.683(2)   |
| C(2)-B(11)  | 1.702(2)   |
| C(2)-B(6)   | 1.714(2)   |
| B(4)-B(9)   | 1.778(2)   |
| B(4)-B(5)   | 1.778(2)   |
| B(4)-B(8)   | 1.782(2)   |
| B(5)-B(9)   | 1.766(2)   |
| B(5)-B(10)  | 1.767(2)   |
| B(5)-B(6)   | 1.772(3)   |
| B(6)-B(10)  | 1.759(3)   |
| B(6)-B(11)  | 1.773(3)   |

|               |          |
|---------------|----------|
| B(7)-B(12)    | 1.770(2) |
| B(7)-B(11)    | 1.771(3) |
| B(7)-B(8)     | 1.782(3) |
| B(8)-B(12)    | 1.787(2) |
| B(8)-B(9)     | 1.789(2) |
| B(9)-B(12)    | 1.779(3) |
| B(9)-B(10)    | 1.783(3) |
| B(10)-B(11)   | 1.777(3) |
| B(10)-B(12)   | 1.789(3) |
| B(11)-B(12)   | 1.775(3) |
| C(1')-C(2')   | 1.595(2) |
| C(1')-B(4')   | 1.678(2) |
| C(1')-B(5')   | 1.703(2) |
| C(1')-B(6')   | 1.715(3) |
| C(2')-B(7')   | 1.682(2) |
| C(2')-B(11')  | 1.696(2) |
| C(2')-B(6')   | 1.717(2) |
| B(4')-B(9')   | 1.767(2) |
| B(4')-B(5')   | 1.773(3) |
| B(4')-B(8')   | 1.776(3) |
| B(5')-B(9')   | 1.775(3) |
| B(5')-B(10')  | 1.776(3) |
| B(5')-B(6')   | 1.776(3) |
| B(6')-B(10')  | 1.757(3) |
| B(6')-B(11')  | 1.778(3) |
| B(7')-B(12')  | 1.771(2) |
| B(7')-B(11')  | 1.776(3) |
| B(7')-B(8')   | 1.780(2) |
| B(8')-B(12')  | 1.785(2) |
| B(8')-B(9')   | 1.785(3) |
| B(9')-B(12')  | 1.780(3) |
| B(9')-B(10')  | 1.790(3) |
| B(10')-B(11') | 1.774(3) |
| B(10')-B(12') | 1.786(3) |
| B(11')-B(12') | 1.767(3) |

|                   |           |
|-------------------|-----------|
| C(1')-Cr(1)-C(2)  | 138.93(6) |
| C(1')-Cr(1)-C(1)  | 177.58(6) |
| C(2)-Cr(1)-C(1)   | 43.21(6)  |
| C(1')-Cr(1)-C(2') | 42.98(6)  |
| C(2)-Cr(1)-C(2')  | 176.98(6) |
| C(1)-Cr(1)-C(2')  | 134.95(6) |
| C(1')-Cr(1)-B(4') | 44.74(6)  |
| C(2)-Cr(1)-B(4')  | 104.50(6) |

|                   |            |
|-------------------|------------|
| C(1)-Cr(1)-B(4')  | 137.47(6)  |
| C(2')-Cr(1)-B(4') | 75.67(6)   |
| C(1')-Cr(1)-B(4)  | 133.15(6)  |
| C(2)-Cr(1)-B(4)   | 75.87(6)   |
| C(1)-Cr(1)-B(4)   | 44.70(6)   |
| C(2')-Cr(1)-B(4)  | 104.14(6)  |
| B(4')-Cr(1)-B(4)  | 176.70(6)  |
| C(1')-Cr(1)-B(7)  | 105.06(6)  |
| C(2)-Cr(1)-B(7)   | 44.74(6)   |
| C(1)-Cr(1)-B(7)   | 76.00(6)   |
| C(2')-Cr(1)-B(7)  | 138.28(6)  |
| B(4')-Cr(1)-B(7)  | 99.09(6)   |
| B(4)-Cr(1)-B(7)   | 78.82(6)   |
| C(1')-Cr(1)-B(7') | 75.86(6)   |
| C(2)-Cr(1)-B(7')  | 132.32(6)  |
| C(1)-Cr(1)-B(7')  | 103.23(6)  |
| C(2')-Cr(1)-B(7') | 44.67(6)   |
| B(4')-Cr(1)-B(7') | 78.77(6)   |
| B(4)-Cr(1)-B(7')  | 103.46(6)  |
| B(7)-Cr(1)-B(7')  | 176.00(6)  |
| C(1')-Cr(1)-B(8') | 76.28(6)   |
| C(2)-Cr(1)-B(8')  | 101.79(6)  |
| C(1)-Cr(1)-B(8')  | 104.78(6)  |
| C(2')-Cr(1)-B(8') | 76.09(6)   |
| B(4')-Cr(1)-B(8') | 46.40(7)   |
| B(4)-Cr(1)-B(8')  | 136.87(6)  |
| B(7)-Cr(1)-B(8')  | 129.83(6)  |
| B(7')-Cr(1)-B(8') | 46.38(6)   |
| C(1')-Cr(1)-B(8)  | 102.74(6)  |
| C(2)-Cr(1)-B(8)   | 76.28(6)   |
| C(1)-Cr(1)-B(8)   | 76.36(6)   |
| C(2')-Cr(1)-B(8)  | 105.97(6)  |
| B(4')-Cr(1)-B(8)  | 130.33(6)  |
| B(4)-Cr(1)-B(8)   | 46.44(6)   |
| B(7)-Cr(1)-B(8)   | 46.40(6)   |
| B(7')-Cr(1)-B(8)  | 137.43(6)  |
| B(8')-Cr(1)-B(8)  | 175.93(6)  |
| C(5)-S(1)-C(3)    | 96.01(7)   |
| C(5)-S(2)-C(4)    | 96.33(7)   |
| C(6)-S(3)-C(7)    | 96.36(7)   |
| C(6)-S(4)-C(8)    | 96.35(7)   |
| C(4)-C(3)-C(9)    | 127.00(15) |
| C(4)-C(3)-S(1)    | 116.60(12) |
| C(9)-C(3)-S(1)    | 116.40(12) |

|                  |            |
|------------------|------------|
| C(3)-C(4)-C(10)  | 127.31(15) |
| C(3)-C(4)-S(2)   | 116.04(12) |
| C(10)-C(4)-S(2)  | 116.65(12) |
| C(6)-C(5)-S(2)   | 122.80(12) |
| C(6)-C(5)-S(1)   | 122.23(12) |
| S(2)-C(5)-S(1)   | 114.86(9)  |
| C(5)-C(6)-S(4)   | 122.85(12) |
| C(5)-C(6)-S(3)   | 122.36(12) |
| S(4)-C(6)-S(3)   | 114.79(9)  |
| C(8)-C(7)-C(11)  | 126.42(14) |
| C(8)-C(7)-S(3)   | 115.97(12) |
| C(11)-C(7)-S(3)  | 117.44(11) |
| C(7)-C(8)-C(12)  | 126.18(15) |
| C(7)-C(8)-S(4)   | 116.40(12) |
| C(12)-C(8)-S(4)  | 117.26(12) |
| C(2)-C(1)-B(4)   | 111.45(11) |
| C(2)-C(1)-B(5)   | 111.45(11) |
| B(4)-C(1)-B(5)   | 63.30(10)  |
| C(2)-C(1)-B(6)   | 62.04(10)  |
| B(4)-C(1)-B(6)   | 115.13(12) |
| B(5)-C(1)-B(6)   | 62.31(10)  |
| C(2)-C(1)-Cr(1)  | 68.29(7)   |
| B(4)-C(1)-Cr(1)  | 69.53(8)   |
| B(5)-C(1)-Cr(1)  | 128.71(10) |
| B(6)-C(1)-Cr(1)  | 127.94(10) |
| C(1)-C(2)-B(7)   | 111.89(12) |
| C(1)-C(2)-B(11)  | 112.11(12) |
| B(7)-C(2)-B(11)  | 63.09(10)  |
| C(1)-C(2)-B(6)   | 62.28(10)  |
| B(7)-C(2)-B(6)   | 115.13(12) |
| B(11)-C(2)-B(6)  | 62.53(10)  |
| C(1)-C(2)-Cr(1)  | 68.50(7)   |
| B(7)-C(2)-Cr(1)  | 69.77(8)   |
| B(11)-C(2)-Cr(1) | 128.97(11) |
| B(6)-C(2)-Cr(1)  | 128.35(10) |
| C(1)-B(4)-B(9)   | 104.63(12) |
| C(1)-B(4)-B(5)   | 59.10(9)   |
| B(9)-B(4)-B(5)   | 59.54(10)  |
| C(1)-B(4)-B(8)   | 105.51(12) |
| B(9)-B(4)-B(8)   | 60.34(9)   |
| B(5)-B(4)-B(8)   | 108.57(12) |
| C(1)-B(4)-Cr(1)  | 65.77(7)   |
| B(9)-B(4)-Cr(1)  | 122.35(10) |
| B(5)-B(4)-Cr(1)  | 121.39(10) |

|                  |            |
|------------------|------------|
| B(8)-B(4)-Cr(1)  | 68.00(7)   |
| C(1)-B(5)-B(9)   | 104.01(11) |
| C(1)-B(5)-B(10)  | 104.37(12) |
| B(9)-B(5)-B(10)  | 60.60(10)  |
| C(1)-B(5)-B(6)   | 59.13(10)  |
| B(9)-B(5)-B(6)   | 108.21(12) |
| B(10)-B(5)-B(6)  | 59.57(10)  |
| C(1)-B(5)-B(4)   | 57.59(9)   |
| B(9)-B(5)-B(4)   | 60.24(10)  |
| B(10)-B(5)-B(4)  | 108.36(12) |
| B(6)-B(5)-B(4)   | 107.78(12) |
| C(2)-B(6)-C(1)   | 55.68(9)   |
| C(2)-B(6)-B(10)  | 104.26(12) |
| C(1)-B(6)-B(10)  | 104.31(12) |
| C(2)-B(6)-B(5)   | 103.40(12) |
| C(1)-B(6)-B(5)   | 58.56(10)  |
| B(10)-B(6)-B(5)  | 60.07(10)  |
| C(2)-B(6)-B(11)  | 58.39(10)  |
| C(1)-B(6)-B(11)  | 103.52(12) |
| B(10)-B(6)-B(11) | 60.42(10)  |
| B(5)-B(6)-B(11)  | 107.99(13) |
| C(2)-B(7)-B(12)  | 104.79(12) |
| C(2)-B(7)-B(11)  | 58.98(10)  |
| B(12)-B(7)-B(11) | 60.18(10)  |
| C(2)-B(7)-B(8)   | 105.15(11) |
| B(12)-B(7)-B(8)  | 60.39(10)  |
| B(11)-B(7)-B(8)  | 109.03(12) |
| C(2)-B(7)-Cr(1)  | 65.49(7)   |
| B(12)-B(7)-Cr(1) | 122.37(11) |
| B(11)-B(7)-Cr(1) | 121.21(10) |
| B(8)-B(7)-Cr(1)  | 67.86(8)   |
| B(7)-B(8)-B(4)   | 105.95(11) |
| B(7)-B(8)-B(12)  | 59.48(10)  |
| B(4)-B(8)-B(12)  | 106.93(12) |
| B(7)-B(8)-B(9)   | 106.62(12) |
| B(4)-B(8)-B(9)   | 59.74(9)   |
| B(12)-B(8)-B(9)  | 59.68(10)  |
| B(7)-B(8)-Cr(1)  | 65.73(7)   |
| B(4)-B(8)-Cr(1)  | 65.56(7)   |
| B(12)-B(8)-Cr(1) | 119.65(11) |
| B(9)-B(8)-Cr(1)  | 119.65(10) |
| B(5)-B(9)-B(4)   | 60.22(10)  |
| B(5)-B(9)-B(12)  | 108.03(13) |
| B(4)-B(9)-B(12)  | 107.39(12) |

|                   |            |
|-------------------|------------|
| B(5)-B(9)-B(10)   | 59.74(10)  |
| B(4)-B(9)-B(10)   | 107.67(12) |
| B(12)-B(9)-B(10)  | 60.28(10)  |
| B(5)-B(9)-B(8)    | 108.78(12) |
| B(4)-B(9)-B(8)    | 59.92(9)   |
| B(12)-B(9)-B(8)   | 60.09(10)  |
| B(10)-B(9)-B(8)   | 108.72(12) |
| B(6)-B(10)-B(5)   | 60.36(10)  |
| B(6)-B(10)-B(11)  | 60.20(10)  |
| B(5)-B(10)-B(11)  | 108.04(12) |
| B(6)-B(10)-B(9)   | 108.08(12) |
| B(5)-B(10)-B(9)   | 59.66(10)  |
| B(11)-B(10)-B(9)  | 107.56(12) |
| B(6)-B(10)-B(12)  | 108.04(12) |
| B(5)-B(10)-B(12)  | 107.55(12) |
| B(11)-B(10)-B(12) | 59.72(10)  |
| B(9)-B(10)-B(12)  | 59.77(10)  |
| C(2)-B(11)-B(7)   | 57.93(9)   |
| C(2)-B(11)-B(6)   | 59.08(10)  |
| B(7)-B(11)-B(6)   | 108.01(12) |
| C(2)-B(11)-B(12)  | 103.78(12) |
| B(7)-B(11)-B(12)  | 59.89(10)  |
| B(6)-B(11)-B(12)  | 107.99(13) |
| C(2)-B(11)-B(10)  | 103.99(12) |
| B(7)-B(11)-B(10)  | 108.05(13) |
| B(6)-B(11)-B(10)  | 59.38(10)  |
| B(12)-B(11)-B(10) | 60.47(10)  |
| B(7)-B(12)-B(11)  | 59.93(10)  |
| B(7)-B(12)-B(9)   | 107.56(12) |
| B(11)-B(12)-B(9)  | 107.78(12) |
| B(7)-B(12)-B(8)   | 60.13(10)  |
| B(11)-B(12)-B(8)  | 108.62(12) |
| B(9)-B(12)-B(8)   | 60.22(10)  |
| B(7)-B(12)-B(10)  | 107.56(12) |
| B(11)-B(12)-B(10) | 59.81(10)  |
| B(9)-B(12)-B(10)  | 59.95(10)  |
| B(8)-B(12)-B(10)  | 108.55(12) |
| C(2')-C(1')-B(4') | 111.60(12) |
| C(2')-C(1')-B(5') | 112.07(12) |
| B(4')-C(1')-B(5') | 63.25(11)  |
| C(2')-C(1')-B(6') | 62.37(10)  |
| B(4')-C(1')-B(6') | 115.34(12) |
| B(5')-C(1')-B(6') | 62.61(11)  |
| C(2')-C(1')-Cr(1) | 68.75(8)   |



|                     |            |
|---------------------|------------|
| B(4')-C(1')-Cr(1)   | 69.49(8)   |
| B(5')-C(1')-Cr(1)   | 129.02(11) |
| B(6')-C(1')-Cr(1)   | 128.79(11) |
| C(1')-C(2')-B(7')   | 111.91(12) |
| C(1')-C(2')-B(11')  | 112.15(12) |
| B(7')-C(2')-B(11')  | 63.42(10)  |
| C(1')-C(2')-B(6')   | 62.25(11)  |
| B(7')-C(2')-B(6')   | 115.78(12) |
| B(11')-C(2')-B(6')  | 62.79(11)  |
| C(1')-C(2')-Cr(1)   | 68.28(8)   |
| B(7')-C(2')-Cr(1)   | 69.66(8)   |
| B(11')-C(2')-Cr(1)  | 129.09(10) |
| B(6')-C(2')-Cr(1)   | 128.24(11) |
| C(1')-B(4')-B(9')   | 104.89(13) |
| C(1')-B(4')-B(5')   | 59.07(10)  |
| B(9')-B(4')-B(5')   | 60.18(11)  |
| C(1')-B(4')-B(8')   | 105.45(12) |
| B(9')-B(4')-B(8')   | 60.50(10)  |
| B(5')-B(4')-B(8')   | 109.30(13) |
| C(1')-B(4')-Cr(1)   | 65.77(7)   |
| B(9')-B(4')-Cr(1)   | 122.80(11) |
| B(5')-B(4')-Cr(1)   | 121.70(11) |
| B(8')-B(4')-Cr(1)   | 68.13(8)   |
| C(1')-B(5')-B(4')   | 57.68(10)  |
| C(1')-B(5')-B(9')   | 103.50(12) |
| B(4')-B(5')-B(9')   | 59.75(11)  |
| C(1')-B(5')-B(10')  | 103.69(13) |
| B(4')-B(5')-B(10')  | 107.79(13) |
| B(9')-B(5')-B(10')  | 60.55(11)  |
| C(1')-B(5')-B(6')   | 59.03(10)  |
| B(4')-B(5')-B(6')   | 107.77(13) |
| B(9')-B(5')-B(6')   | 108.01(13) |
| B(10')-B(5')-B(6')  | 59.30(11)  |
| C(1')-B(6')-C(2')   | 55.38(9)   |
| C(1')-B(6')-B(10')  | 103.98(13) |
| C(2')-B(6')-B(10')  | 103.80(13) |
| C(1')-B(6')-B(5')   | 58.36(10)  |
| C(2')-B(6')-B(5')   | 103.11(13) |
| B(10')-B(6')-B(5')  | 60.35(11)  |
| C(1')-B(6')-B(11')  | 102.87(12) |
| C(2')-B(6')-B(11')  | 58.04(10)  |
| B(10')-B(6')-B(11') | 60.24(11)  |
| B(5')-B(6')-B(11')  | 107.94(13) |
| C(2')-B(7')-B(12')  | 104.12(12) |

|                      |            |
|----------------------|------------|
| C(2')-B(7')-B(11')   | 58.68(10)  |
| B(12')-B(7')-B(11')  | 59.77(10)  |
| C(2')-B(7')-B(8')    | 105.02(12) |
| B(12')-B(7')-B(8')   | 60.35(10)  |
| B(11')-B(7')-B(8')   | 108.70(12) |
| C(2')-B(7')-Cr(1)    | 65.67(7)   |
| B(12')-B(7')-Cr(1)   | 122.06(10) |
| B(11')-B(7')-Cr(1)   | 121.03(10) |
| B(8')-B(7')-Cr(1)    | 67.79(8)   |
| B(4')-B(8')-B(7')    | 105.97(12) |
| B(4')-B(8')-B(12')   | 106.58(12) |
| B(7')-B(8')-B(12')   | 59.58(10)  |
| B(4')-B(8')-B(9')    | 59.49(10)  |
| B(7')-B(8')-B(9')    | 107.02(12) |
| B(12')-B(8')-B(9')   | 59.80(10)  |
| B(4')-B(8')-Cr(1)    | 65.48(7)   |
| B(7')-B(8')-Cr(1)    | 65.83(7)   |
| B(12')-B(8')-Cr(1)   | 119.65(10) |
| B(9')-B(8')-Cr(1)    | 119.55(11) |
| B(4')-B(9')-B(5')    | 60.06(11)  |
| B(4')-B(9')-B(12')   | 107.21(12) |
| B(5')-B(9')-B(12')   | 107.82(13) |
| B(4')-B(9')-B(8')    | 60.01(10)  |
| B(5')-B(9')-B(8')    | 108.81(12) |
| B(12')-B(9')-B(8')   | 60.10(10)  |
| B(4')-B(9')-B(10')   | 107.41(13) |
| B(5')-B(9')-B(10')   | 59.75(11)  |
| B(12')-B(9')-B(10')  | 60.03(11)  |
| B(8')-B(9')-B(10')   | 108.58(12) |
| B(6')-B(10')-B(11')  | 60.46(11)  |
| B(6')-B(10')-B(5')   | 60.35(11)  |
| B(11')-B(10')-B(5')  | 108.12(12) |
| B(6')-B(10')-B(12')  | 108.14(12) |
| B(11')-B(10')-B(12') | 59.53(10)  |
| B(5')-B(10')-B(12')  | 107.51(13) |
| B(6')-B(10')-B(9')   | 108.16(13) |
| B(11')-B(10')-B(9')  | 107.41(13) |
| B(5')-B(10')-B(9')   | 59.70(11)  |
| B(12')-B(10')-B(9')  | 59.70(11)  |
| C(2')-B(11')-B(12')  | 103.70(12) |
| C(2')-B(11')-B(10')  | 103.93(13) |
| B(12')-B(11')-B(10') | 60.56(11)  |
| C(2')-B(11')-B(7')   | 57.90(9)   |
| B(12')-B(11')-B(7')  | 59.99(10)  |

|                      |            |
|----------------------|------------|
| B(10')-B(11')-B(7')  | 108.27(13) |
| C(2')-B(11')-B(6')   | 59.17(10)  |
| B(12')-B(11')-B(6')  | 108.04(13) |
| B(10')-B(11')-B(6')  | 59.30(11)  |
| B(7')-B(11')-B(6')   | 108.21(12) |
| B(11')-B(12')-B(7')  | 60.24(10)  |
| B(11')-B(12')-B(9')  | 108.17(13) |
| B(7')-B(12')-B(9')   | 107.66(12) |
| B(11')-B(12')-B(8')  | 108.87(12) |
| B(7')-B(12')-B(8')   | 60.08(9)   |
| B(9')-B(12')-B(8')   | 60.10(10)  |
| B(11')-B(12')-B(10') | 59.91(11)  |
| B(7')-B(12')-B(10')  | 107.95(12) |
| B(9')-B(12')-B(10')  | 60.28(11)  |
| B(8')-B(12')-B(10')  | 108.78(13) |

**Table S2.** Bond lengths (Å) and selected angles (°) in (TMTTF)[3,3'-Fe(1,2-C<sub>2</sub>B<sub>9</sub>H<sub>10</sub>)<sub>2</sub>] (2).

|              |            |
|--------------|------------|
| Fe(1)-C(1)   | 2.0790(9)  |
| Fe(1)-C(1)#1 | 2.0790(9)  |
| Fe(1)-C(2)#1 | 2.1000(8)  |
| Fe(1)-C(2)#2 | 2.1000(8)  |
| Fe(1)-C(2)#3 | 2.1000(8)  |
| Fe(1)-C(2)   | 2.1001(8)  |
| Fe(1)-B(8)   | 2.1494(8)  |
| Fe(1)-B(8)#2 | 2.1494(8)  |
| Fe(1)-B(8)#1 | 2.1494(8)  |
| Fe(1)-B(8)#3 | 2.1494(8)  |
| S(1)-C(3)    | 1.7140(6)  |
| S(1)-C(4)    | 1.7363(8)  |
| C(1)-C(2)    | 1.6505(9)  |
| C(1)-C(2)#2  | 1.6506(9)  |
| C(1)-B(5)    | 1.7140(12) |
| C(1)-B(5)#2  | 1.7140(12) |
| C(2)-B(8)    | 1.7434(11) |
| C(2)-B(9)    | 1.7453(12) |
| C(2)-B(5)    | 1.7494(12) |
| B(9)-B(12)   | 1.7728(12) |
| B(9)-B(5)    | 1.7734(12) |
| B(9)-B(10)   | 1.7835(12) |
| B(9)-B(8)    | 1.7941(12) |

|              |            |
|--------------|------------|
| B(10)-B(5)#2 | 1.7704(14) |
| B(10)-B(5)   | 1.7704(14) |
| B(10)-B(12)  | 1.7867(17) |
| B(5)-B(5)#2  | 1.7765(19) |
| B(8)-B(12)   | 1.7906(13) |
| B(8)-B(8)#2  | 1.7910(17) |
| C(3)-C(3)#4  | 1.397(2)   |
| C(4)-C(4)#5  | 1.3514(17) |
| C(4)-C(5)    | 1.4992(12) |

|                     |           |
|---------------------|-----------|
| C(1)-Fe(1)-C(1)#1   | 180.0     |
| C(1)-Fe(1)-C(2)#1   | 133.48(2) |
| C(1)#1-Fe(1)-C(2)#1 | 46.52(2)  |
| C(1)-Fe(1)-C(2)#2   | 46.52(2)  |
| C(1)#1-Fe(1)-C(2)#2 | 133.48(2) |
| C(2)#1-Fe(1)-C(2)#2 | 99.06(4)  |
| C(1)-Fe(1)-C(2)#3   | 133.48(2) |
| C(1)#1-Fe(1)-C(2)#3 | 46.52(2)  |
| C(2)#1-Fe(1)-C(2)#3 | 80.94(4)  |
| C(2)#2-Fe(1)-C(2)#3 | 180.00(4) |
| C(1)-Fe(1)-C(2)     | 46.52(2)  |
| C(1)#1-Fe(1)-C(2)   | 133.48(2) |
| C(2)#1-Fe(1)-C(2)   | 180.0     |
| C(2)#2-Fe(1)-C(2)   | 80.94(4)  |
| C(2)#3-Fe(1)-C(2)   | 99.06(4)  |
| C(1)-Fe(1)-B(8)     | 81.46(3)  |
| C(1)#1-Fe(1)-B(8)   | 98.54(3)  |
| C(2)#1-Fe(1)-B(8)   | 131.57(3) |
| C(2)#2-Fe(1)-B(8)   | 82.95(3)  |
| C(2)#3-Fe(1)-B(8)   | 97.05(3)  |
| C(2)-Fe(1)-B(8)     | 48.43(3)  |
| C(1)-Fe(1)-B(8)#2   | 81.46(3)  |
| C(1)#1-Fe(1)-B(8)#2 | 98.54(3)  |
| C(2)#1-Fe(1)-B(8)#2 | 97.05(3)  |
| C(2)#2-Fe(1)-B(8)#2 | 48.42(3)  |
| C(2)#3-Fe(1)-B(8)#2 | 131.58(3) |
| C(2)-Fe(1)-B(8)#2   | 82.95(3)  |
| B(8)-Fe(1)-B(8)#2   | 49.24(5)  |
| C(1)-Fe(1)-B(8)#1   | 98.54(3)  |
| C(1)#1-Fe(1)-B(8)#1 | 81.46(3)  |
| C(2)#1-Fe(1)-B(8)#1 | 48.42(3)  |
| C(2)#2-Fe(1)-B(8)#1 | 97.05(3)  |
| C(2)#3-Fe(1)-B(8)#1 | 82.95(3)  |
| C(2)-Fe(1)-B(8)#1   | 131.58(3) |

|                     |           |
|---------------------|-----------|
| B(8)-Fe(1)-B(8)#1   | 180.0     |
| B(8)#2-Fe(1)-B(8)#1 | 130.76(5) |
| C(1)-Fe(1)-B(8)#3   | 98.54(3)  |
| C(1)#1-Fe(1)-B(8)#3 | 81.46(3)  |
| C(2)#1-Fe(1)-B(8)#3 | 82.95(3)  |
| C(2)#2-Fe(1)-B(8)#3 | 131.58(3) |
| C(2)#3-Fe(1)-B(8)#3 | 48.42(3)  |
| C(2)-Fe(1)-B(8)#3   | 97.05(3)  |
| B(8)-Fe(1)-B(8)#3   | 130.76(5) |
| B(8)#2-Fe(1)-B(8)#3 | 180.00(5) |
| B(8)#1-Fe(1)-B(8)#3 | 49.24(5)  |
| C(3)-S(1)-C(4)      | 96.66(4)  |
| C(2)-C(1)-C(2)#2    | 111.34(8) |
| C(2)-C(1)-B(5)      | 62.62(5)  |
| C(2)#2-C(1)-B(5)    | 113.34(7) |
| C(2)-C(1)-B(5)#2    | 113.33(7) |
| C(2)#2-C(1)-B(5)#2  | 62.63(5)  |
| B(5)-C(1)-B(5)#2    | 62.43(7)  |
| C(2)-C(1)-Fe(1)     | 67.41(4)  |
| C(2)#2-C(1)-Fe(1)   | 67.41(4)  |
| B(5)-C(1)-Fe(1)     | 125.90(5) |
| B(5)#2-C(1)-Fe(1)   | 125.90(5) |
| C(1)-C(2)-B(8)      | 108.77(6) |
| C(1)-C(2)-B(9)      | 108.04(6) |
| B(8)-C(2)-B(9)      | 61.90(5)  |
| C(1)-C(2)-B(5)      | 60.46(5)  |
| B(8)-C(2)-B(5)      | 112.01(6) |
| B(9)-C(2)-B(5)      | 60.99(5)  |
| C(1)-C(2)-Fe(1)     | 66.07(4)  |
| B(8)-C(2)-Fe(1)     | 67.27(4)  |
| B(9)-C(2)-Fe(1)     | 123.12(5) |
| B(5)-C(2)-Fe(1)     | 122.68(5) |
| C(2)-B(9)-B(12)     | 105.74(6) |
| C(2)-B(9)-B(5)      | 59.62(5)  |
| B(12)-B(9)-B(5)     | 107.91(6) |
| C(2)-B(9)-B(10)     | 106.17(6) |
| B(12)-B(9)-B(10)    | 60.32(6)  |
| B(5)-B(9)-B(10)     | 59.70(6)  |
| C(2)-B(9)-B(8)      | 59.00(5)  |
| B(12)-B(9)-B(8)     | 60.26(5)  |
| B(5)-B(9)-B(8)      | 108.52(6) |
| B(10)-B(9)-B(8)     | 108.84(6) |
| B(5)#2-B(10)-B(5)   | 60.23(7)  |
| B(5)#2-B(10)-B(9)#2 | 59.87(5)  |

|                     |           |
|---------------------|-----------|
| B(5)-B(10)-B(9)#2   | 107.81(7) |
| B(5)#2-B(10)-B(9)   | 107.81(7) |
| B(5)-B(10)-B(9)     | 59.87(5)  |
| B(9)#2-B(10)-B(9)   | 107.25(8) |
| B(5)#2-B(10)-B(12)  | 107.43(7) |
| B(5)-B(10)-B(12)    | 107.43(7) |
| B(9)#2-B(10)-B(12)  | 59.54(5)  |
| B(9)-B(10)-B(12)    | 59.54(5)  |
| C(1)-B(5)-C(2)      | 56.91(4)  |
| C(1)-B(5)-B(10)     | 104.59(6) |
| C(2)-B(5)-B(10)     | 106.57(6) |
| C(1)-B(5)-B(9)      | 104.02(6) |
| C(2)-B(5)-B(9)      | 59.39(5)  |
| B(10)-B(5)-B(9)     | 60.43(5)  |
| C(1)-B(5)-B(5)#2    | 58.79(4)  |
| C(2)-B(5)-B(5)#2    | 105.75(4) |
| B(10)-B(5)-B(5)#2   | 59.89(4)  |
| B(9)-B(5)-B(5)#2    | 107.99(4) |
| C(2)-B(8)-B(12)     | 105.06(6) |
| C(2)-B(8)-B(8)#2    | 105.56(4) |
| B(12)-B(8)-B(8)#2   | 59.99(3)  |
| C(2)-B(8)-B(9)      | 59.11(5)  |
| B(12)-B(8)-B(9)     | 59.28(5)  |
| B(8)#2-B(8)-B(9)    | 107.53(4) |
| C(2)-B(8)-Fe(1)     | 64.31(4)  |
| B(12)-B(8)-Fe(1)    | 118.33(5) |
| B(8)#2-B(8)-Fe(1)   | 65.38(2)  |
| B(9)-B(8)-Fe(1)     | 118.02(5) |
| B(9)#2-B(12)-B(9)   | 108.19(8) |
| B(9)#2-B(12)-B(10)  | 60.14(5)  |
| B(9)-B(12)-B(10)    | 60.14(5)  |
| B(9)#2-B(12)-B(8)#2 | 60.46(5)  |
| B(9)-B(12)-B(8)#2   | 108.49(7) |
| B(10)-B(12)-B(8)#2  | 108.85(7) |
| B(9)#2-B(12)-B(8)   | 108.49(7) |
| B(9)-B(12)-B(8)     | 60.46(5)  |
| B(10)-B(12)-B(8)    | 108.85(7) |
| B(8)#2-B(12)-B(8)   | 60.01(7)  |
| C(3)#4-C(3)-S(1)    | 122.81(3) |
| C(3)#4-C(3)-S(1)#5  | 122.81(3) |
| S(1)-C(3)-S(1)#5    | 114.37(7) |
| C(4)#5-C(4)-C(5)    | 127.31(6) |
| C(4)#5-C(4)-S(1)    | 116.14(3) |
| C(5)-C(4)-S(1)      | 116.55(7) |

---

Symmetry transformations used to generate equivalent atoms:

#1 -x,-y,-z      #2 x,-y,z      #3 -x,y,-z  
#4 -x,-y-1,-z      #5 x,-y-1,z

**Table S3.** Bond lengths (Å) and selected angles (°) in (TMTSF)[3,3'-Cr(1,2-C<sub>2</sub>B<sub>9</sub>H<sub>10</sub>)<sub>2</sub>] (3).

|              |           |
|--------------|-----------|
| Cr(1)-C(1)#1 | 2.175(7)  |
| Cr(1)-C(1)   | 2.175(7)  |
| Cr(1)-C(2)   | 2.176(7)  |
| Cr(1)-C(2)#1 | 2.176(7)  |
| Cr(1)-B(4)#1 | 2.226(8)  |
| Cr(1)-B(4)   | 2.226(8)  |
| Cr(1)-B(7)   | 2.244(8)  |
| Cr(1)-B(7)#1 | 2.244(8)  |
| Cr(1)-B(8)   | 2.277(8)  |
| Cr(1)-B(8)#1 | 2.277(8)  |
| Se(1)-C(7)   | 1.877(7)  |
| Se(1)-C(4)   | 1.900(7)  |
| Se(2)-C(7)   | 1.867(7)  |
| Se(2)-C(5)   | 1.891(7)  |
| Se(3)-C(8)   | 1.882(7)  |
| Se(3)-C(10)  | 1.899(7)  |
| Se(4)-C(11)  | 1.884(7)  |
| Se(4)-C(8)   | 1.879(7)  |
| C(2)-C(1)    | 1.619(10) |
| C(2)-B(7)    | 1.698(10) |
| C(2)-B(11)   | 1.699(11) |
| C(2)-B(6)    | 1.730(11) |
| C(1)-B(4)    | 1.676(11) |
| C(1)-B(5)    | 1.718(11) |
| C(1)-B(6)    | 1.722(11) |
| C(3)-C(4)    | 1.513(10) |
| C(4)-C(5)    | 1.344(9)  |
| C(5)-C(6)    | 1.490(10) |
| C(7)-C(8)    | 1.366(11) |
| C(9)-C(10)   | 1.498(10) |
| C(10)-C(11)  | 1.352(10) |
| C(11)-C(12)  | 1.502(10) |
| B(4)-B(8)    | 1.764(12) |
| B(4)-B(9)    | 1.777(11) |

|             |           |
|-------------|-----------|
| B(4)-B(5)   | 1.789(12) |
| B(5)-B(6)   | 1.783(12) |
| B(5)-B(10)  | 1.769(11) |
| B(5)-B(9)   | 1.771(11) |
| B(6)-B(10)  | 1.762(12) |
| B(6)-B(11)  | 1.784(12) |
| B(7)-B(11)  | 1.781(12) |
| B(7)-B(8)   | 1.793(11) |
| B(7)-B(12)  | 1.792(11) |
| B(8)-B(12)  | 1.783(12) |
| B(8)-B(9)   | 1.798(12) |
| B(9)-B(12)  | 1.771(12) |
| B(9)-B(10)  | 1.780(12) |
| B(10)-B(11) | 1.763(13) |
| B(10)-B(12) | 1.779(11) |
| B(11)-B(12) | 1.774(11) |

|                     |          |
|---------------------|----------|
| C(1)#1-Cr(1)-C(1)   | 180.0    |
| C(1)#1-Cr(1)-C(2)   | 136.3(3) |
| C(1)-Cr(1)-C(2)     | 43.7(3)  |
| C(1)#1-Cr(1)-C(2)#1 | 43.7(3)  |
| C(1)-Cr(1)-C(2)#1   | 136.3(3) |
| C(2)-Cr(1)-C(2)#1   | 180.0    |
| C(1)#1-Cr(1)-B(4)#1 | 44.7(3)  |
| C(1)-Cr(1)-B(4)#1   | 135.3(3) |
| C(2)-Cr(1)-B(4)#1   | 103.8(3) |
| C(2)#1-Cr(1)-B(4)#1 | 76.2(3)  |
| C(1)#1-Cr(1)-B(4)   | 135.3(3) |
| C(1)-Cr(1)-B(4)     | 44.7(3)  |
| C(2)-Cr(1)-B(4)     | 76.2(3)  |
| C(2)#1-Cr(1)-B(4)   | 103.8(3) |
| B(4)#1-Cr(1)-B(4)   | 180.0    |
| C(1)#1-Cr(1)-B(7)   | 103.2(3) |
| C(1)-Cr(1)-B(7)     | 76.8(3)  |
| C(2)-Cr(1)-B(7)     | 45.1(3)  |
| C(2)#1-Cr(1)-B(7)   | 134.9(3) |
| B(4)#1-Cr(1)-B(7)   | 100.9(3) |
| B(4)-Cr(1)-B(7)     | 79.1(3)  |
| C(1)#1-Cr(1)-B(7)#1 | 76.8(3)  |
| C(1)-Cr(1)-B(7)#1   | 103.2(3) |
| C(2)-Cr(1)-B(7)#1   | 134.9(3) |
| C(2)#1-Cr(1)-B(7)#1 | 45.1(3)  |
| B(4)#1-Cr(1)-B(7)#1 | 79.1(3)  |
| B(4)-Cr(1)-B(7)#1   | 100.9(3) |



|                     |          |
|---------------------|----------|
| B(7)-Cr(1)-B(7)#1   | 180.0    |
| C(1)#1-Cr(1)-B(8)   | 103.5(3) |
| C(1)-Cr(1)-B(8)     | 76.5(3)  |
| C(2)-Cr(1)-B(8)     | 76.6(3)  |
| C(2)#1-Cr(1)-B(8)   | 103.4(3) |
| B(4)#1-Cr(1)-B(8)   | 133.9(3) |
| B(4)-Cr(1)-B(8)     | 46.1(3)  |
| B(7)-Cr(1)-B(8)     | 46.7(3)  |
| B(7)#1-Cr(1)-B(8)   | 133.3(3) |
| C(1)#1-Cr(1)-B(8)#1 | 76.5(3)  |
| C(1)-Cr(1)-B(8)#1   | 103.5(3) |
| C(2)-Cr(1)-B(8)#1   | 103.4(3) |
| C(2)#1-Cr(1)-B(8)#1 | 76.6(3)  |
| B(4)#1-Cr(1)-B(8)#1 | 46.1(3)  |
| B(4)-Cr(1)-B(8)#1   | 133.9(3) |
| B(7)-Cr(1)-B(8)#1   | 133.3(3) |
| B(7)#1-Cr(1)-B(8)#1 | 46.7(3)  |
| B(8)-Cr(1)-B(8)#1   | 180.0    |
| C(7)-Se(1)-C(4)     | 93.8(3)  |
| C(7)-Se(2)-C(5)     | 94.3(3)  |
| C(8)-Se(3)-C(10)    | 93.9(3)  |
| C(11)-Se(4)-C(8)    | 94.6(3)  |
| C(1)-C(2)-B(7)      | 111.7(5) |
| C(1)-C(2)-B(11)     | 111.2(6) |
| B(7)-C(2)-B(11)     | 63.2(5)  |
| C(1)-C(2)-B(6)      | 61.8(5)  |
| B(7)-C(2)-B(6)      | 115.7(6) |
| B(11)-C(2)-B(6)     | 62.7(5)  |
| C(1)-C(2)-Cr(1)     | 68.1(4)  |
| B(7)-C(2)-Cr(1)     | 69.5(4)  |
| B(11)-C(2)-Cr(1)    | 128.3(5) |
| B(6)-C(2)-Cr(1)     | 127.6(5) |
| C(2)-C(1)-B(4)      | 111.0(5) |
| C(2)-C(1)-B(5)      | 111.8(5) |
| B(4)-C(1)-B(5)      | 63.6(5)  |
| C(2)-C(1)-B(6)      | 62.3(5)  |
| B(4)-C(1)-B(6)      | 115.2(5) |
| B(5)-C(1)-B(6)      | 62.5(5)  |
| C(2)-C(1)-Cr(1)     | 68.2(4)  |
| B(4)-C(1)-Cr(1)     | 69.2(4)  |
| B(5)-C(1)-Cr(1)     | 129.0(5) |
| B(6)-C(1)-Cr(1)     | 128.1(5) |
| C(5)-C(4)-C(3)      | 127.3(7) |
| C(5)-C(4)-Se(1)     | 118.6(5) |

|                   |          |
|-------------------|----------|
| C(3)-C(4)-Se(1)   | 114.2(5) |
| C(4)-C(5)-C(6)    | 127.2(7) |
| C(4)-C(5)-Se(2)   | 118.5(5) |
| C(6)-C(5)-Se(2)   | 114.3(5) |
| C(8)-C(7)-Se(2)   | 122.6(6) |
| C(8)-C(7)-Se(1)   | 122.5(6) |
| Se(2)-C(7)-Se(1)  | 114.9(4) |
| C(7)-C(8)-Se(3)   | 123.1(6) |
| C(7)-C(8)-Se(4)   | 122.5(6) |
| Se(3)-C(8)-Se(4)  | 114.4(4) |
| C(11)-C(10)-C(9)  | 127.2(7) |
| C(11)-C(10)-Se(3) | 118.7(6) |
| C(9)-C(10)-Se(3)  | 114.1(5) |
| C(10)-C(11)-C(12) | 126.5(7) |
| C(10)-C(11)-Se(4) | 118.4(5) |
| C(12)-C(11)-Se(4) | 115.1(6) |
| C(1)-B(4)-B(8)    | 106.5(6) |
| C(1)-B(4)-B(9)    | 105.1(6) |
| B(8)-B(4)-B(9)    | 61.0(5)  |
| C(1)-B(4)-B(5)    | 59.3(4)  |
| B(8)-B(4)-B(5)    | 109.5(6) |
| B(9)-B(4)-B(5)    | 59.5(4)  |
| C(1)-B(4)-Cr(1)   | 66.0(4)  |
| B(8)-B(4)-Cr(1)   | 68.5(4)  |
| B(9)-B(4)-Cr(1)   | 123.4(5) |
| B(5)-B(4)-Cr(1)   | 122.1(5) |
| C(1)-B(5)-B(6)    | 58.9(5)  |
| C(1)-B(5)-B(10)   | 103.4(6) |
| B(6)-B(5)-B(10)   | 59.5(5)  |
| C(1)-B(5)-B(9)    | 103.6(6) |
| B(6)-B(5)-B(9)    | 108.2(6) |
| B(10)-B(5)-B(9)   | 60.3(5)  |
| C(1)-B(5)-B(4)    | 57.0(4)  |
| B(6)-B(5)-B(4)    | 106.9(6) |
| B(10)-B(5)-B(4)   | 107.0(6) |
| B(9)-B(5)-B(4)    | 59.9(5)  |
| C(1)-B(6)-C(2)    | 56.0(4)  |
| C(1)-B(6)-B(10)   | 103.6(6) |
| C(2)-B(6)-B(10)   | 103.4(6) |
| C(1)-B(6)-B(5)    | 58.7(5)  |
| C(2)-B(6)-B(5)    | 103.8(6) |
| B(10)-B(6)-B(5)   | 59.9(5)  |
| C(1)-B(6)-B(11)   | 102.7(6) |
| C(2)-B(6)-B(11)   | 57.8(5)  |

|                   |          |
|-------------------|----------|
| B(10)-B(6)-B(11)  | 59.6(5)  |
| B(5)-B(6)-B(11)   | 107.3(6) |
| C(2)-B(7)-B(11)   | 58.4(4)  |
| C(2)-B(7)-B(8)    | 104.5(5) |
| B(11)-B(7)-B(8)   | 107.6(6) |
| C(2)-B(7)-B(12)   | 103.8(6) |
| B(11)-B(7)-B(12)  | 59.6(5)  |
| B(8)-B(7)-B(12)   | 59.6(5)  |
| C(2)-B(7)-Cr(1)   | 65.3(3)  |
| B(11)-B(7)-Cr(1)  | 120.1(5) |
| B(8)-B(7)-Cr(1)   | 67.6(4)  |
| B(12)-B(7)-Cr(1)  | 121.1(5) |
| B(4)-B(8)-B(12)   | 106.6(6) |
| B(4)-B(8)-B(9)    | 59.9(5)  |
| B(12)-B(8)-B(9)   | 59.3(5)  |
| B(4)-B(8)-B(7)    | 106.3(5) |
| B(12)-B(8)-B(7)   | 60.1(5)  |
| B(9)-B(8)-B(7)    | 107.3(6) |
| B(4)-B(8)-Cr(1)   | 65.4(4)  |
| B(12)-B(8)-Cr(1)  | 119.8(5) |
| B(9)-B(8)-Cr(1)   | 119.7(5) |
| B(7)-B(8)-Cr(1)   | 65.7(3)  |
| B(12)-B(9)-B(4)   | 106.6(6) |
| B(12)-B(9)-B(5)   | 108.3(6) |
| B(4)-B(9)-B(5)    | 60.6(5)  |
| B(12)-B(9)-B(10)  | 60.1(5)  |
| B(4)-B(9)-B(10)   | 107.1(6) |
| B(5)-B(9)-B(10)   | 59.8(5)  |
| B(12)-B(9)-B(8)   | 59.9(5)  |
| B(4)-B(9)-B(8)    | 59.1(5)  |
| B(5)-B(9)-B(8)    | 108.8(6) |
| B(10)-B(9)-B(8)   | 108.1(6) |
| B(11)-B(10)-B(6)  | 60.8(5)  |
| B(11)-B(10)-B(5)  | 108.8(6) |
| B(6)-B(10)-B(5)   | 60.7(5)  |
| B(11)-B(10)-B(12) | 60.1(5)  |
| B(6)-B(10)-B(12)  | 109.1(6) |
| B(5)-B(10)-B(12)  | 108.0(6) |
| B(11)-B(10)-B(9)  | 108.0(6) |
| B(6)-B(10)-B(9)   | 108.8(6) |
| B(5)-B(10)-B(9)   | 59.9(5)  |
| B(12)-B(10)-B(9)  | 59.7(5)  |
| C(2)-B(11)-B(10)  | 104.7(6) |
| C(2)-B(11)-B(12)  | 104.5(6) |

|                   |          |
|-------------------|----------|
| B(10)-B(11)-B(12) | 60.4(5)  |
| C(2)-B(11)-B(6)   | 59.5(5)  |
| B(10)-B(11)-B(6)  | 59.6(5)  |
| B(12)-B(11)-B(6)  | 108.3(6) |
| C(2)-B(11)-B(7)   | 58.4(4)  |
| B(10)-B(11)-B(7)  | 109.0(6) |
| B(12)-B(11)-B(7)  | 60.5(5)  |
| B(6)-B(11)-B(7)   | 109.1(6) |
| B(9)-B(12)-B(8)   | 60.8(5)  |
| B(9)-B(12)-B(10)  | 60.2(5)  |
| B(8)-B(12)-B(10)  | 108.8(5) |
| B(9)-B(12)-B(11)  | 107.9(5) |
| B(8)-B(12)-B(11)  | 108.3(5) |
| B(10)-B(12)-B(11) | 59.5(5)  |
| B(9)-B(12)-B(7)   | 108.5(5) |
| B(8)-B(12)-B(7)   | 60.2(4)  |
| B(10)-B(12)-B(7)  | 107.8(5) |
| B(11)-B(12)-B(7)  | 59.9(5)  |

Symmetry transformations used to generate equivalent atoms:

#1 -x+1,-y+1,-z+1

## Reference

1. Steimecke, G.; Sieler, H.-J.; Kirmse, R.; Hoyer, E. 1,3-dithiol-2-thion-4,5-dithiolat aus schwefelkohlenstoff und alkalimetall. *Phosphorus and Sulfur* **1979**, *7*, 49-55 [doi: 10.1080/03086647808069922]
2. Simonsen, K.B.; Svenstrup, N.; Lau, J.; Simonsen, O.; Mork, P.; Kristensen, G.J.; Becher, J. Sequential functionalisation of bis-protected tetrathiafulvalene-dithiolates. *Synthesis* **1996**, 407-418 [doi: 10.1055/s-1996-4216]
3. Hawthorne, M. F.; Yong, D. C.; Andrews, T. D.; Howe, D. V.; Pilling, R. L.; Pitts, A. D.; Reintjes, M.; Warren, L. F.; Wegner, P. A.  $\pi$ -Dicarbonyl derivatives of the transition metals. Metallocene analogs. *J. Am. Chem. Soc.* **1968**, *90*, 879-896. [doi: 10.1021/ja01006a008]
4. Ruhle, H. W.; Hawthorne, M. F.  $\pi$ -Dicarbonyl derivatives of chromium. Metallocene analogs. *Inorg. Chem.* **1968**, *7*, 2279-2282. [doi: 10.1021/ic50069a021]
5. Sheldrick, G. M. A short history of SHELX. *Acta Cryst. A* **2008**, *64*, 112-122 [doi: 10.1107/S0108767307043930]
6. Sheldrick, G. M. Crystal structure refinement with SHELXL. *Acta Cryst. C* **2015**, *71*, 3-8 [doi: 10.1107/S2053229614024218]
7. *APEX2 Software Package*, Bruker AXS, Madison, (Wisconsin, USA). **2005**
